# Supplementary material
Source: Springer Nature journal article supplement (https://www.springermedizin.de/resource/supplementary/12885_2013_5201_MOESM1_ESM.pdf/9466174)

# Supplementary Table

**Supplementary Table 1. Sensitizer enhancement ratio of U251 cells**

| Inhibitor  | SER <sub>0.5</sub> | SER <sub>0.05</sub> |
|------------|--------------------|---------------------|
| RPM        | 1.06               | 1.04                |
| TMZ        | 1.41               | 1.17                |
| TMZ+RPM    | <b>1.21</b>        | <b>1.18</b>         |
| PI103      | 1.41               | 1.20                |
| TMZ        | 1.41               | 1.17                |
| TMZ+PI103  | <b>1.55</b>        | <b>1.34</b>         |
| 17DMAG     | 1.31               | 1.18                |
| TMZ        | 1.41               | 1.17                |
| TMZ+17DMAG | <b>1.55</b>        | <b>1.39</b>         |
| LBH589     | 1.27               | 1.10                |
| TMZ        | 1.41               | 1.17                |
| TMZ+LBH589 | <b>1.50</b>        | <b>1.35</b>         |

**Supplementary Table 2. Sensitizer enhancement ratio of T98G cells**

| Inhibitor  | SER <sub>0.5</sub> | SER <sub>0.05</sub> |
|------------|--------------------|---------------------|
| RPM        | 1.13               | 1.04                |
| TMZ        | 1.26               | 1.07                |
| TMZ+RPM    | <b>1.23</b>        | <b>1.10</b>         |
| PI103      | 1.26               | 1.14                |
| TMZ        | 1.26               | 1.07                |
| TMZ+PI103  | <b>1.65</b>        | <b>1.30</b>         |
| 17DMAG     | 1.16               | 1.03                |
| TMZ        | 1.26               | 1.07                |
| TMZ+17DMAG | <b>1.29</b>        | <b>1.20</b>         |
| LBH589     | 1.24               | 1.01                |
| TMZ        | 1.26               | 1.07                |
| TMZ+LBH589 | <b>1.40</b>        | <b>1.14</b>         |

**Supplementary Table 3. Sensitizer enhancement ratio of U87 cells**

| Inhibitor  | SER <sub>0.5</sub> | SER <sub>0.05</sub> |
|------------|--------------------|---------------------|
| PI103      | 1.05               | 1.08                |
| TMZ        | 1.07               | 1.09                |
| TMZ+PI103  | <b>1.12</b>        | <b>1.21</b>         |
| 17DMAG     | 1.02               | 1.03                |
| TMZ        | 1.07               | 1.09                |
| TMZ+17DMAG | <b>1.08</b>        | <b>1.20</b>         |
| LBH589     | 1.06               | 1.05                |
| TMZ        | 1.07               | 1.09                |
| TMZ+LBH589 | <b>1.2</b>         | <b>1.20</b>         |

# Supplemental data Fig.S1

**A.**

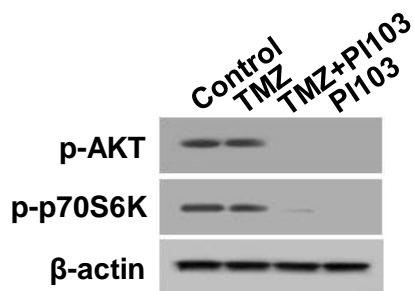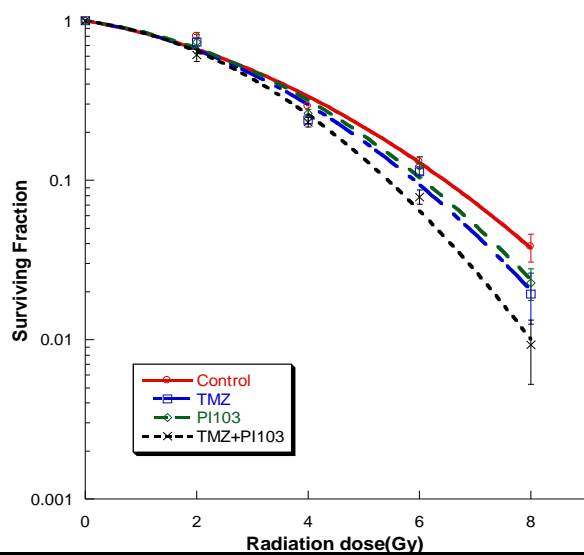

**B.**

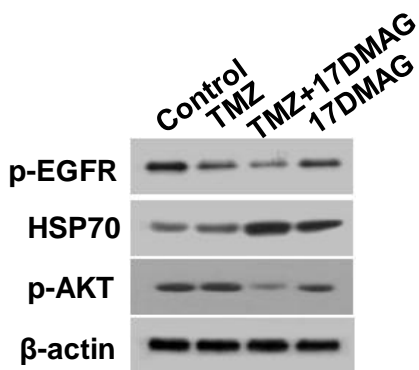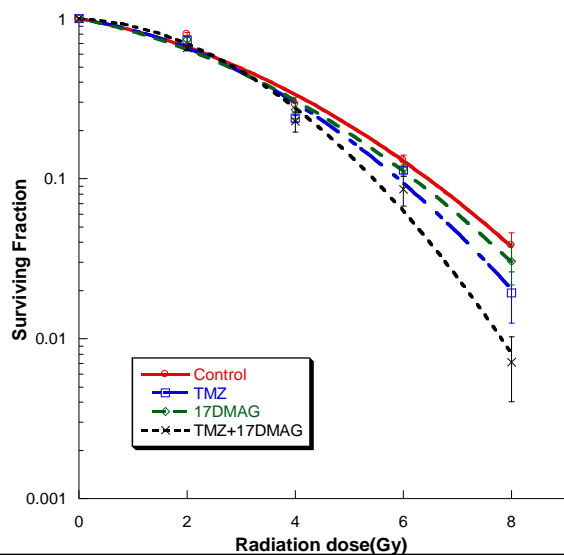

**C.**

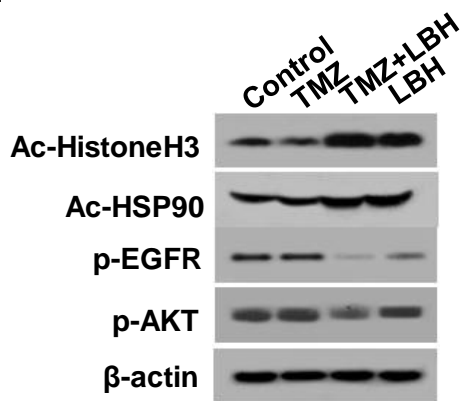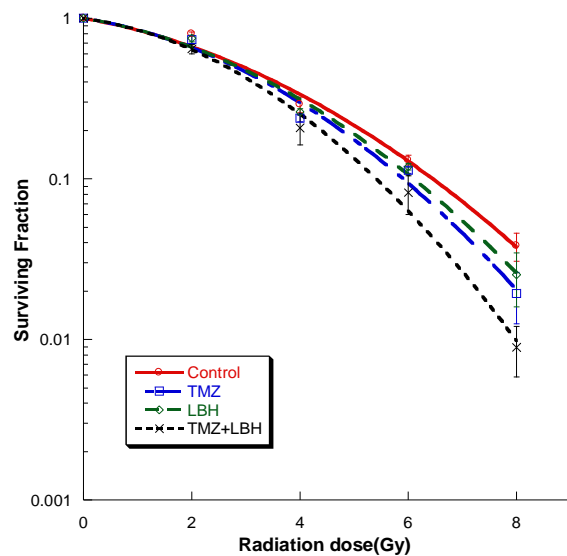

# Supplemental data Fig.S2

**A.**

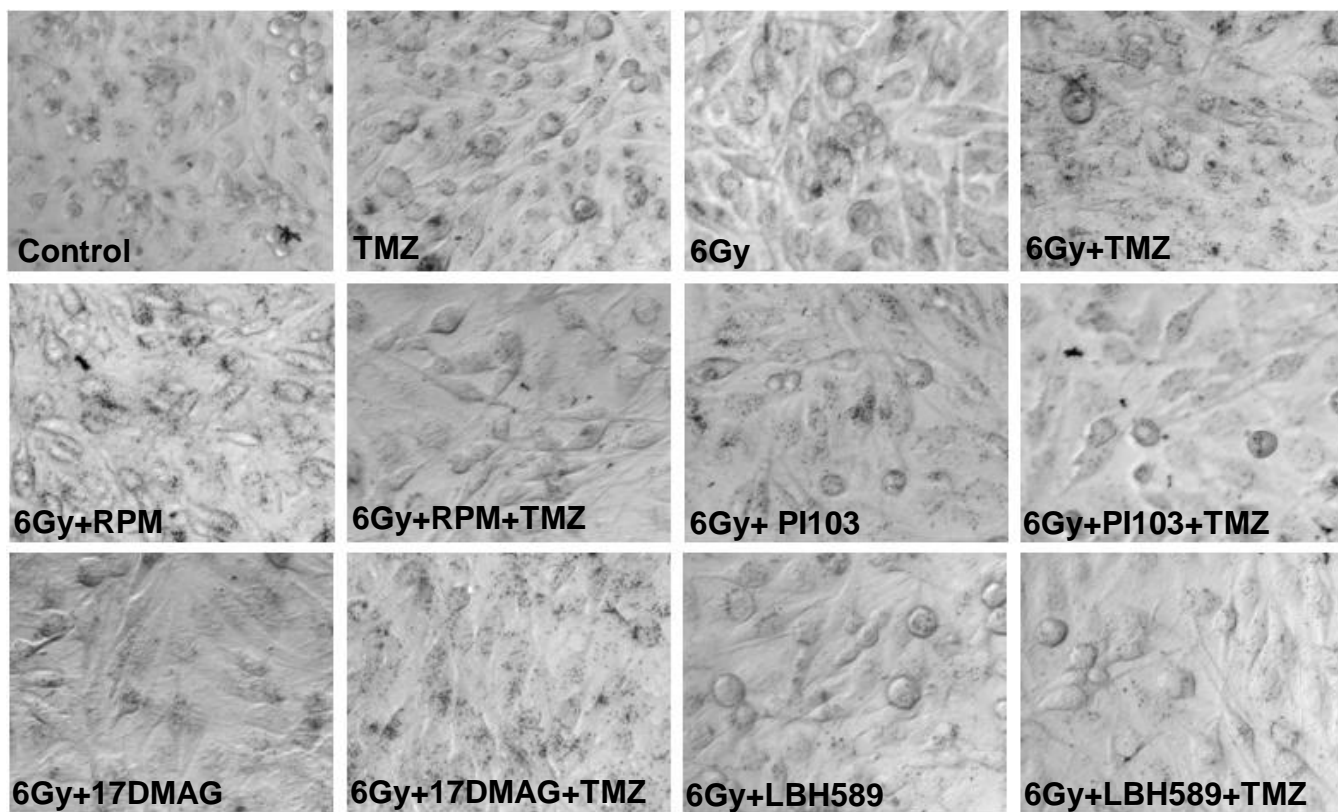

# Supplemental data Fig.S3

**A.**

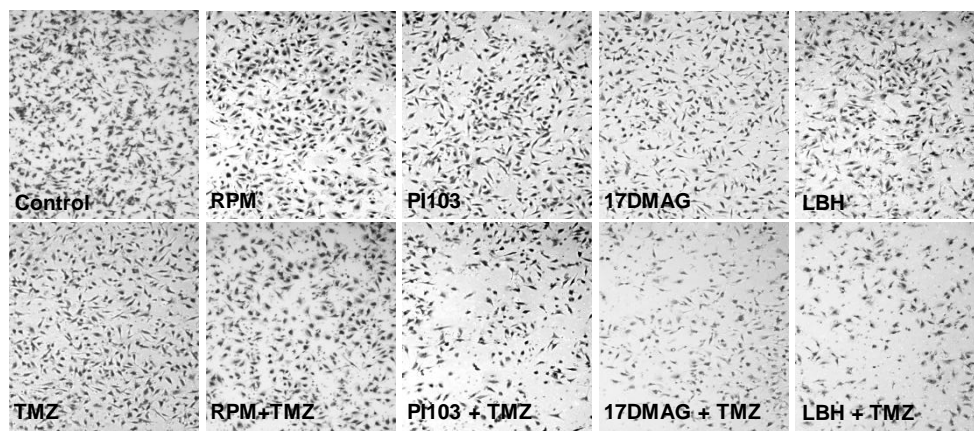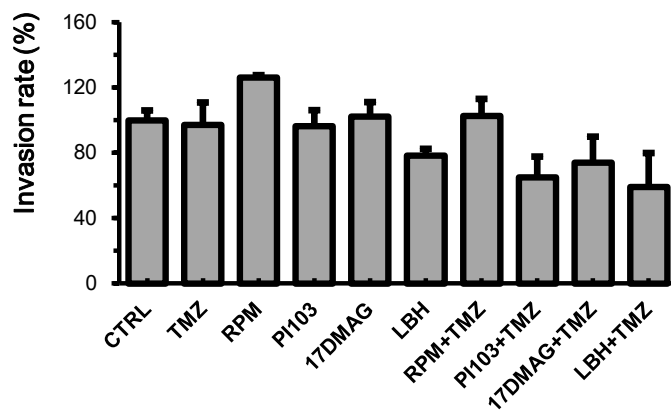

**B.**

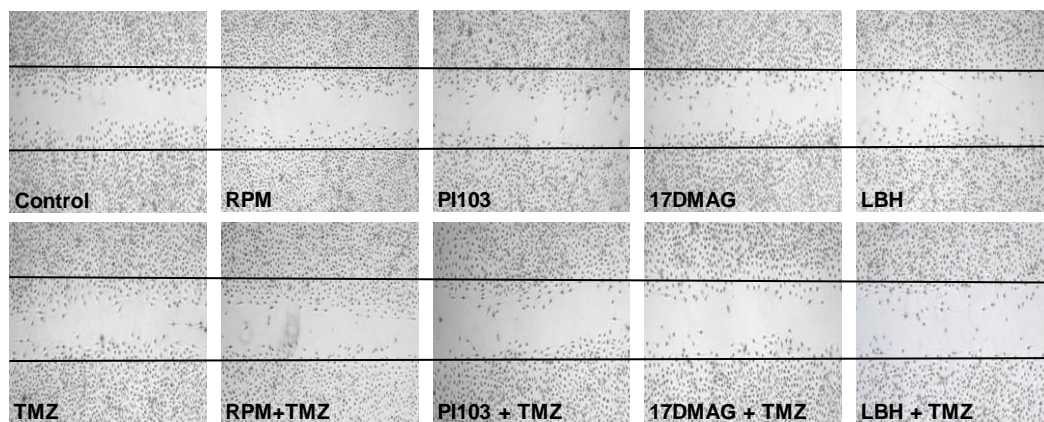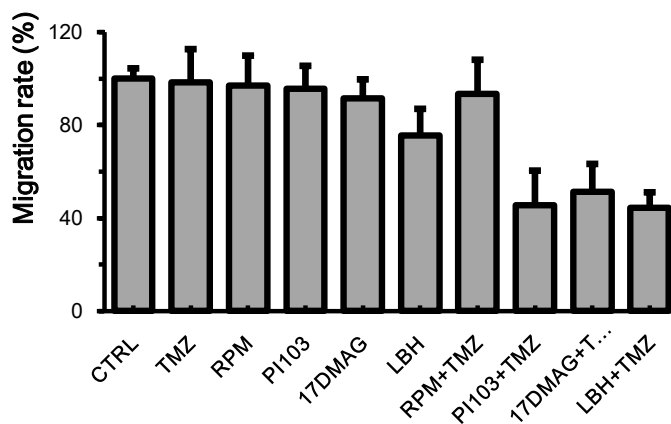

Supplement: MOESM1 [file 9466174]
